# Supplementary material
Source: PubMed Central journal article supplement (PMC6545245)

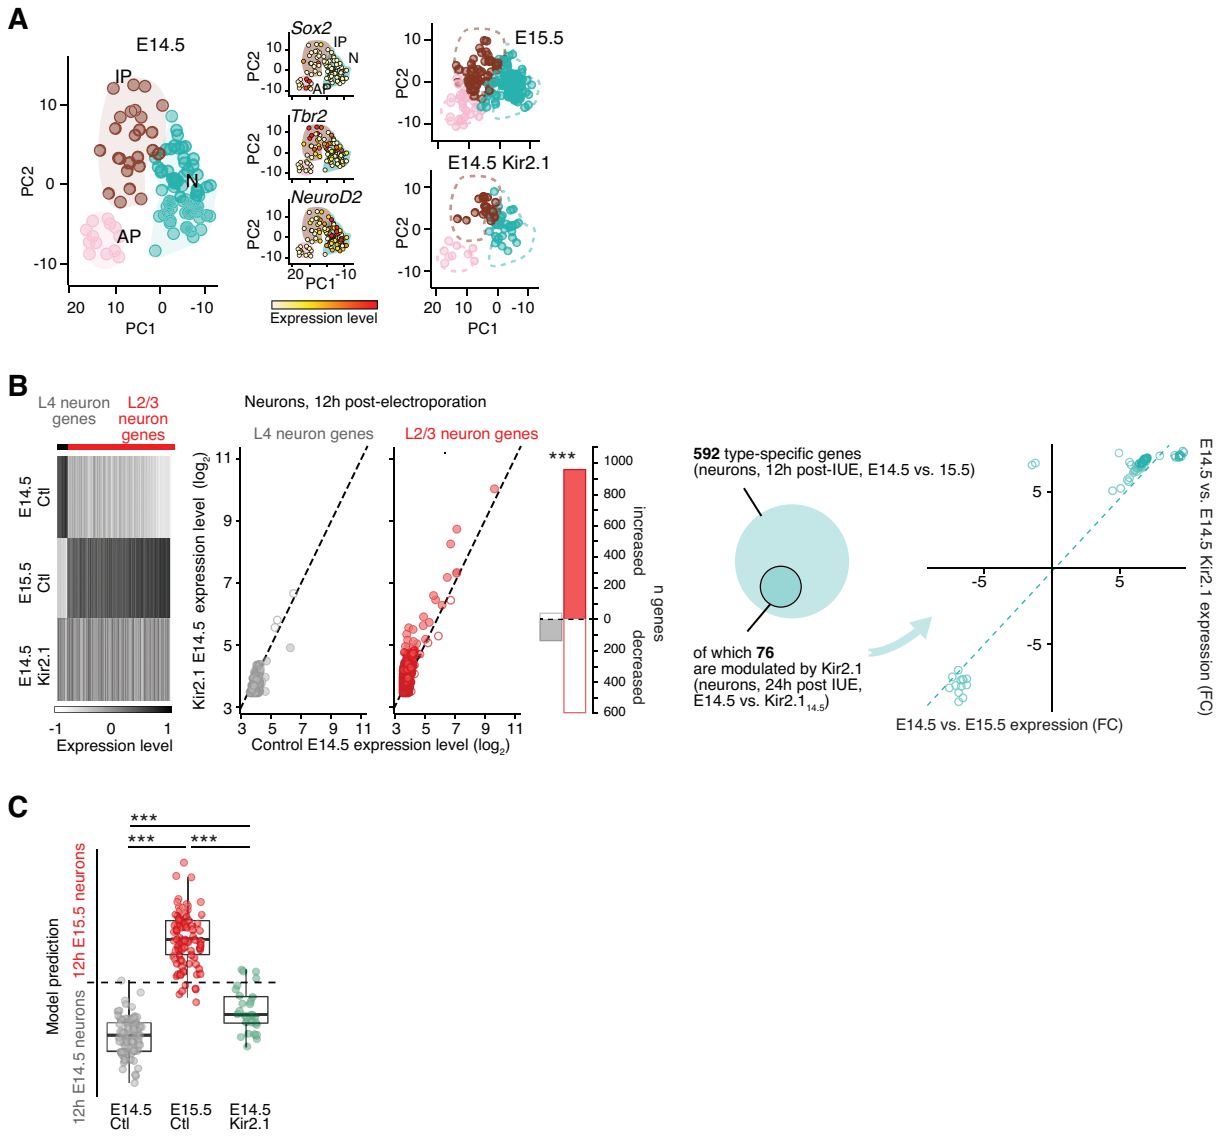

Figure S6, Vitali, Fievre, et al.

Supplement: NIHMS1500473-supplement-10.pdf [file NIHMS1500473-supplement-10.pdf]

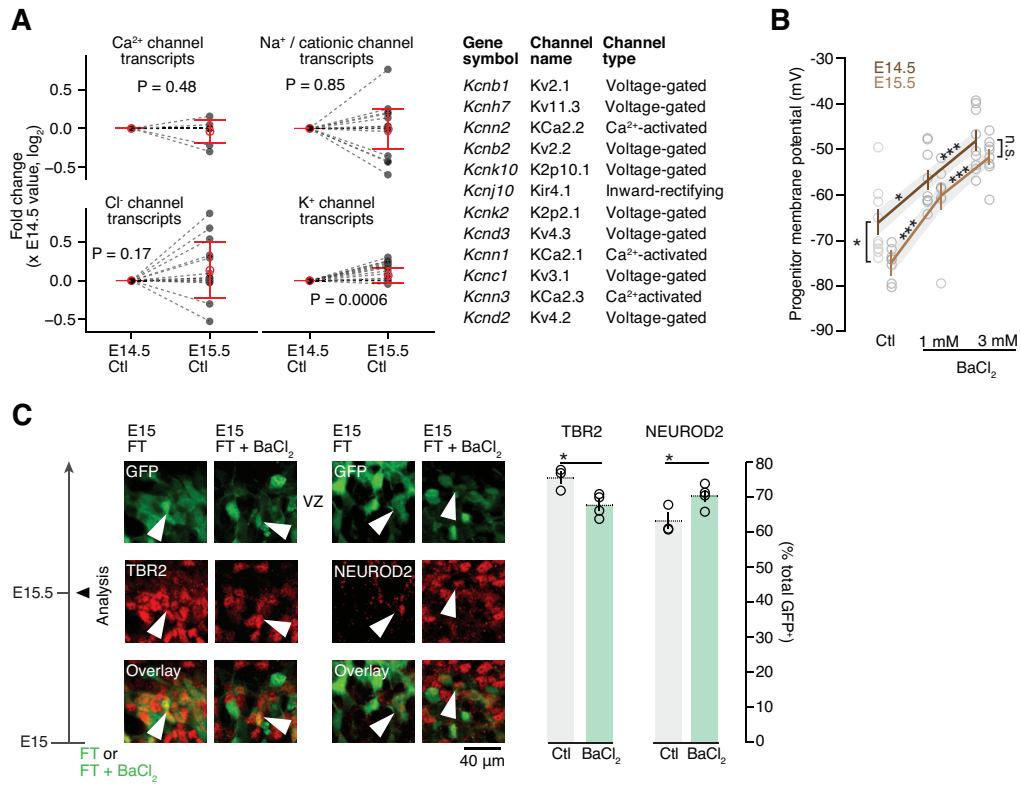

Figure S7. Vitali, Fievre, et al.

Supplement: NIHMS1500473-supplement-11.pdf [file NIHMS1500473-supplement-11.pdf]

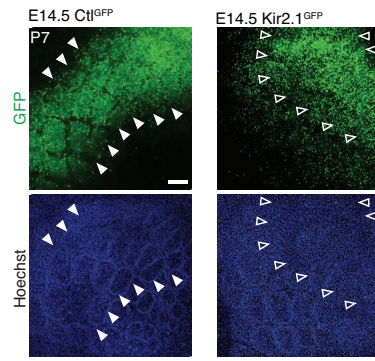

Figure S1. Vitali, Fievre, et al.

Supplement: NIHMS1500473-supplement-5.pdf [file NIHMS1500473-supplement-5.pdf]

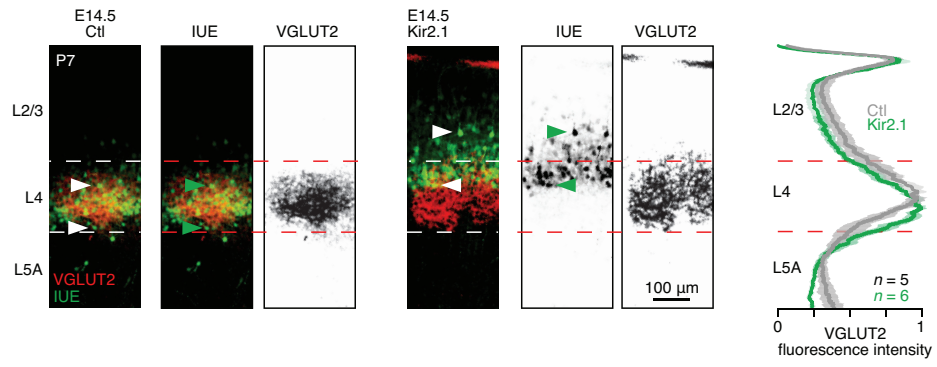

Figure S2. Vitali, Fievre, et al.

Supplement: NIHMS1500473-supplement-6.pdf [file NIHMS1500473-supplement-6.pdf]

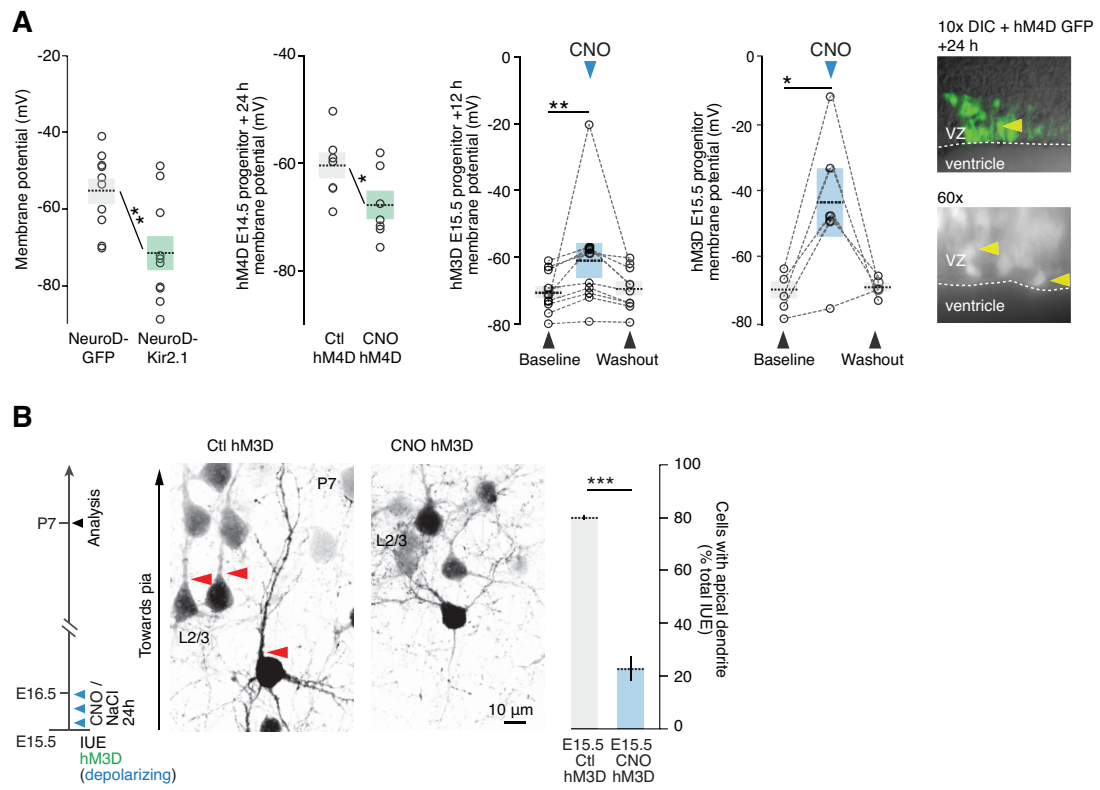

Figure S3. Vitali, Fievre, et al.

Supplement: NIHMS1500473-supplement-7.pdf [file NIHMS1500473-supplement-7.pdf]

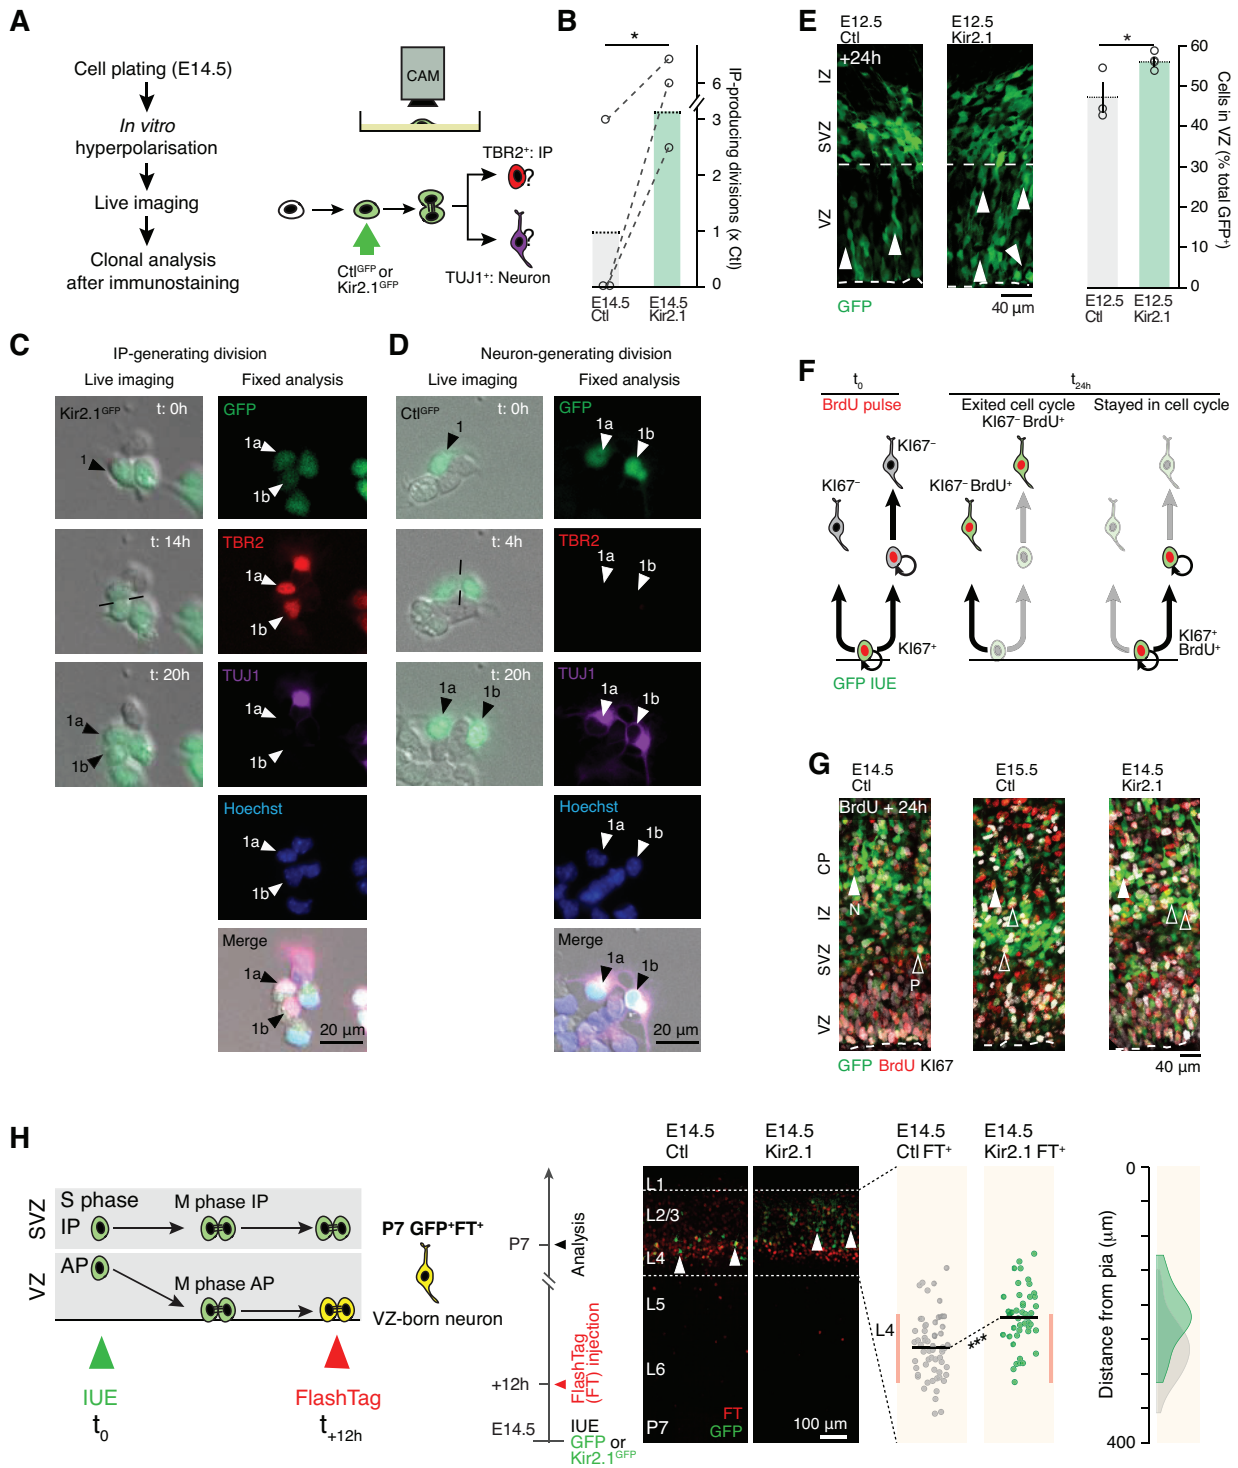

Figure S5. Vitali, Fievre, et al.

Supplement: NIHMS1500473-supplement-9.pdf [file NIHMS1500473-supplement-9.pdf]
